# Supplementary material for: Extraocular muscle function is impaired in ryr3−/− mice
Source: PubMed Central journal article supplement — J Gen Physiol. 2019 May 13;151(7):929–43. doi: 10.1085/jgp.201912333 (PMC6605690; doi:10.1085/jgp.201912333), 2019-05-13
Supplement: JGP_201912333_sm.pdf [file JGP_201912333_sm.pdf]

## Supplemental material

Eckhardt et al., <https://doi.org/10.1085/jgp.201912333>

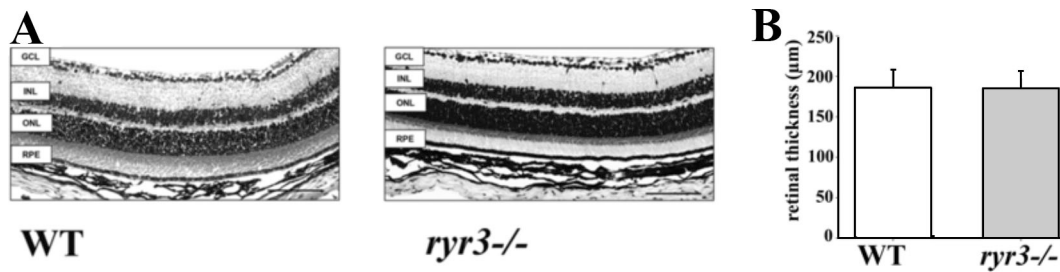

Figure S1. **Retinal morphology and layer structure is unaltered in *ryr3*<sup>-/-</sup> mice.** (A) Overview staining of 5-µm paraffin sections using hematoxylin and eosin revealed no changes in the retinal structure of *ryr3*<sup>-/-</sup> mice compared with their WT controls. GCL, ganglion cell layer; INL, inner nuclear layer; ONL, outer nuclear layer; RPE, retinal pigment epithelium. Scale bars, 100 µm. (B) Furthermore, no significant difference in mean ( $\pm$ SEM) retinal thickness was detectable.

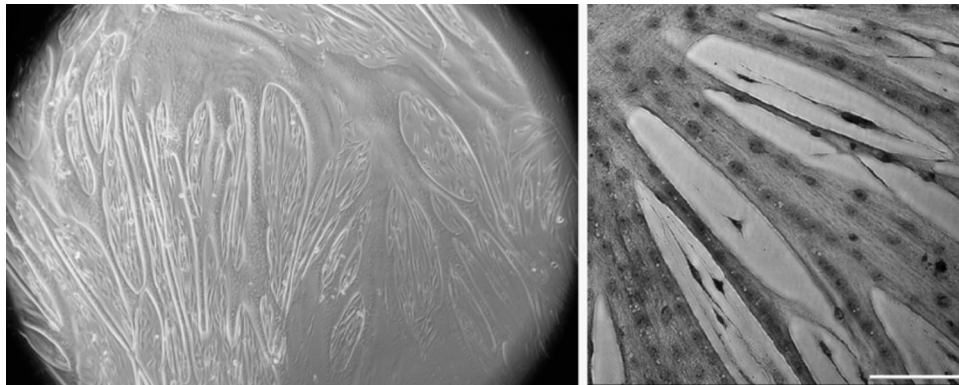

Figure S2. **Photomicrographs of myotubes from EOM.** Left: Low-magnification view of myotubes after 1–2 d in differentiation medium. Right: Cells were fixed with 3% paraformaldehyde 5 d after differentiation medium and stained with hematoxylin and eosin. Scale bar, 50 µm.

Table S1. Primers used for qPCR and mouse genotyping

| Gene            | Forward                           | Reverse                         |
|-----------------|-----------------------------------|---------------------------------|
| ACTN2           | 5'-CATCGAGGAGGATTCAGGAAC-3'       | 5'-CAATCTTGGAACCGCATTTT-3'      |
| CACNA1C         | 5'-TCCCAGACATCCCTACTC-3'          | 5'-ACTGACGGTAGAGATGGTTGC-3'     |
| CACNA1S         | 5'-TCAGCATCGTGGATGGAAAC-3'        | 5'-GTTCCAGAGTGTGTTGTCATCCT-3'   |
| CASQ1           | 5'-ATGAGAGCTACCGACAGGATG-3'       | 5'-CACCGTCGTACTIONCAGGGAAG-3'   |
| CASQ2           | 5'-TGCTCATGGTGGGGTTTATC-3'        | 5'-AGGTTCTGGTGAATAGAGACAGA-3'   |
| JP-45           | 5'-CGGGCTCAAGAAGATGGAAA-3'        | 5'-CTTGTGAGCGTCAGATCTCC-3'      |
| KCNMA1          | 5'-GCCAACAGAGAGCCGAAT-3'          | 5'-TCTTCAAATAGATCAGCCGCC-3'     |
| PVALB           | 5'-ATCAAGAAGCGATAGGAGCC-3'        | 5'-GGCCAGAAGCGTCTTTGTT-3'       |
| RYR1            | 5'-GCCTTTGACGTGGGATTACAG-3'       | 5'-CCCCAACTCGAACCTTCTCTC-3'     |
| RYR3            | 5'-ACCAGCAGG AGCAAG TAC G-3'      | 5'-GGGGTCGTGTCAAAGTAGTCA-3'     |
| RYR3 genotyping | 5'-ATGAAGTTGTACTIONCAGTGCATTGC-3' | 5'-TCCAGGAATCTCTGGTATACTAGG-3'  |
| SLC8A3          | 5'-GCATATGGGGAGCTGGAGTT-3'        | 5'-GCTTCTGTCTGTCACTIONTCTGAT-3' |

Table S2. Kinetic properties of isolated EOM from WT and *ryr3*<sup>-/-</sup> mice

|                                 | EOM                            | Peak force (ms)           | TTHP (ms)               | TTP (ms)                  | HRT (ms)                     |
|---------------------------------|--------------------------------|---------------------------|-------------------------|---------------------------|------------------------------|
| Twitch force kinetic parameters | WT EOM                         | 0.328 ± 0.095<br>(n = 8)  | 2.53 ± 0.24<br>(n = 8)  | 10.09 ± 1.06<br>(n = 8)   | 42.28 ± 9.82<br>(n = 8)      |
|                                 | <i>ryr3</i> <sup>-/-</sup> EOM | 0.126 ± 0.017*<br>(n = 9) | 8.81 ± 2.29*<br>(n = 9) | 42.75 ± 8.78**<br>(n = 9) | 147.44 ± 8.36****<br>(n = 9) |

Experiments were performed at 30°C. Values represent mean ± SEM. \*, P < 0.05; \*\*, P < 0.01; \*\*\*\*, P < 0.0001, Student's *t* test.

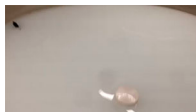

Video 1. **WT mouse swimming in cued water maze.** Experiments were performed as described in the Materials and methods section.

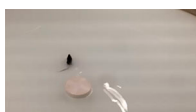

Video 2. ***ryr3*<sup>-/-</sup> mouse swimming in cued water maze.** Experiments were performed as described in the Materials and methods section.
